# Supplementary material
Source: PubMed Central journal article supplement (PMC1783809)
Supplement: JCI0729571sd.pdf [file JCI0729571sd.pdf]

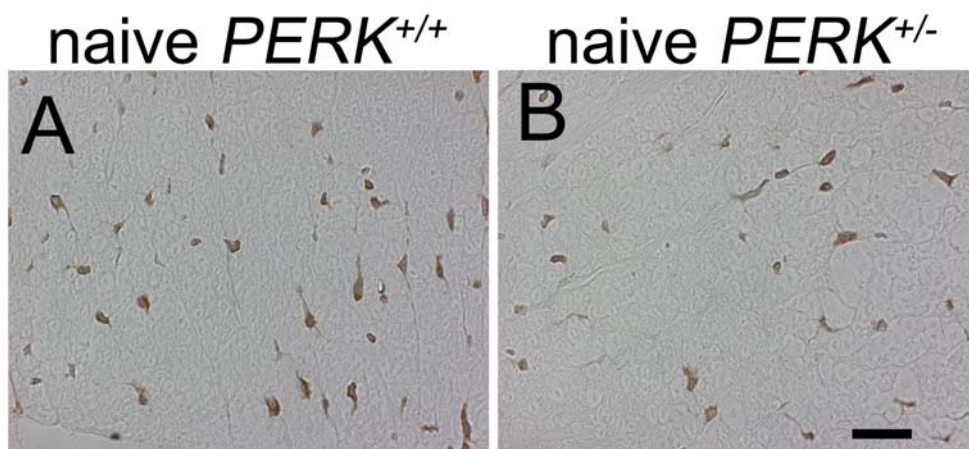

Supplemental Figure 1

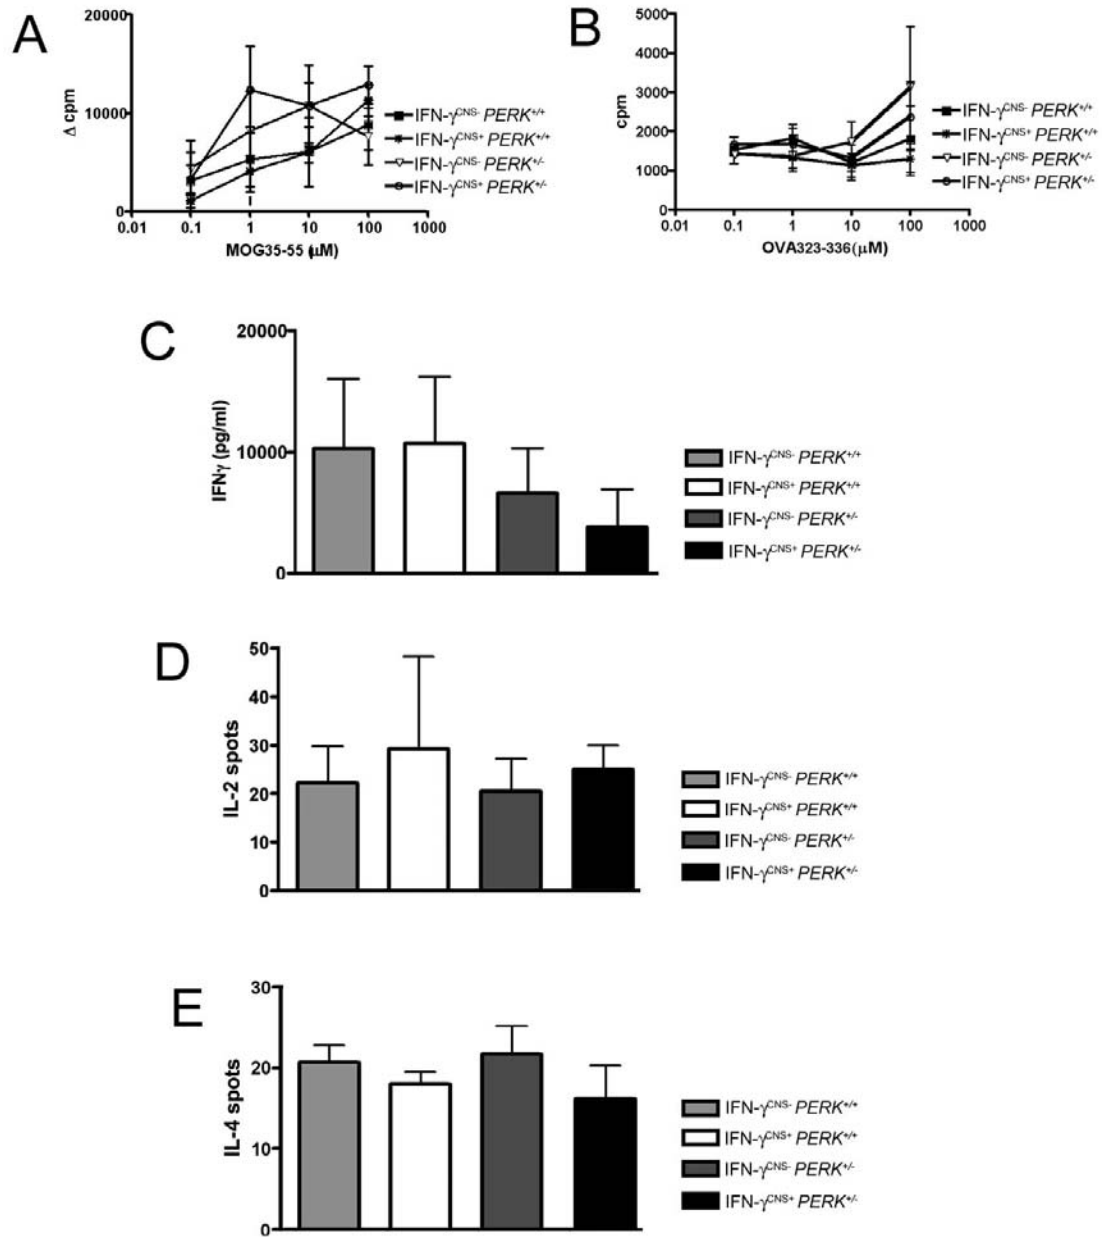

Supplemental Figure 2

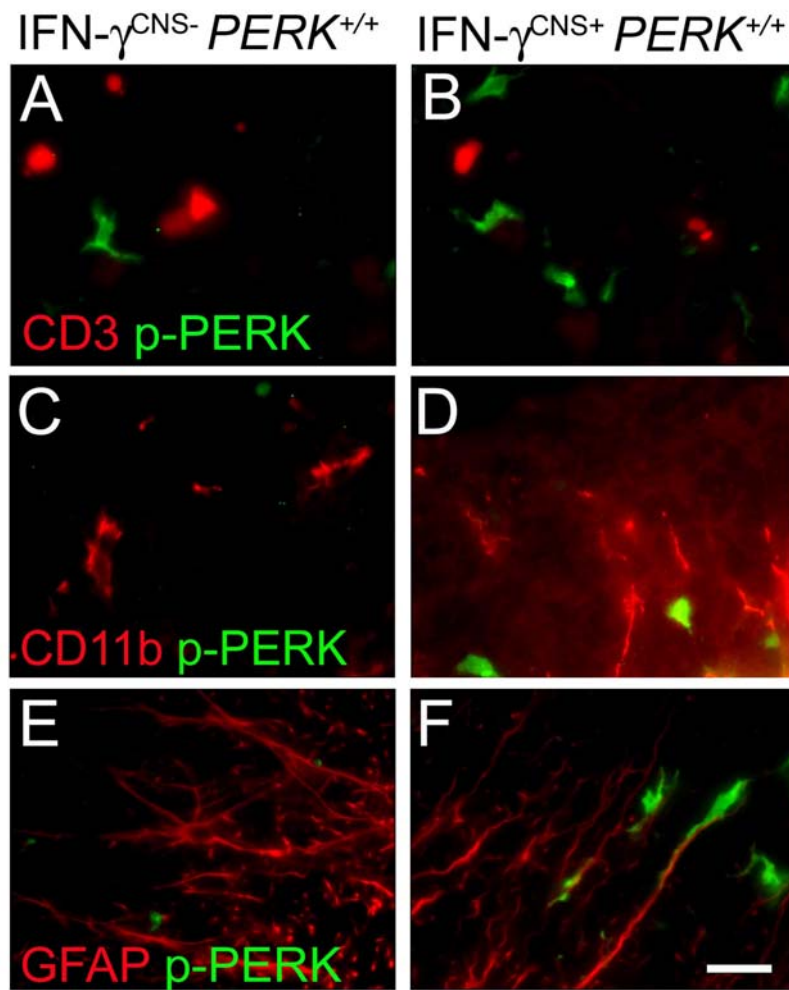

Supplemental Figure 3

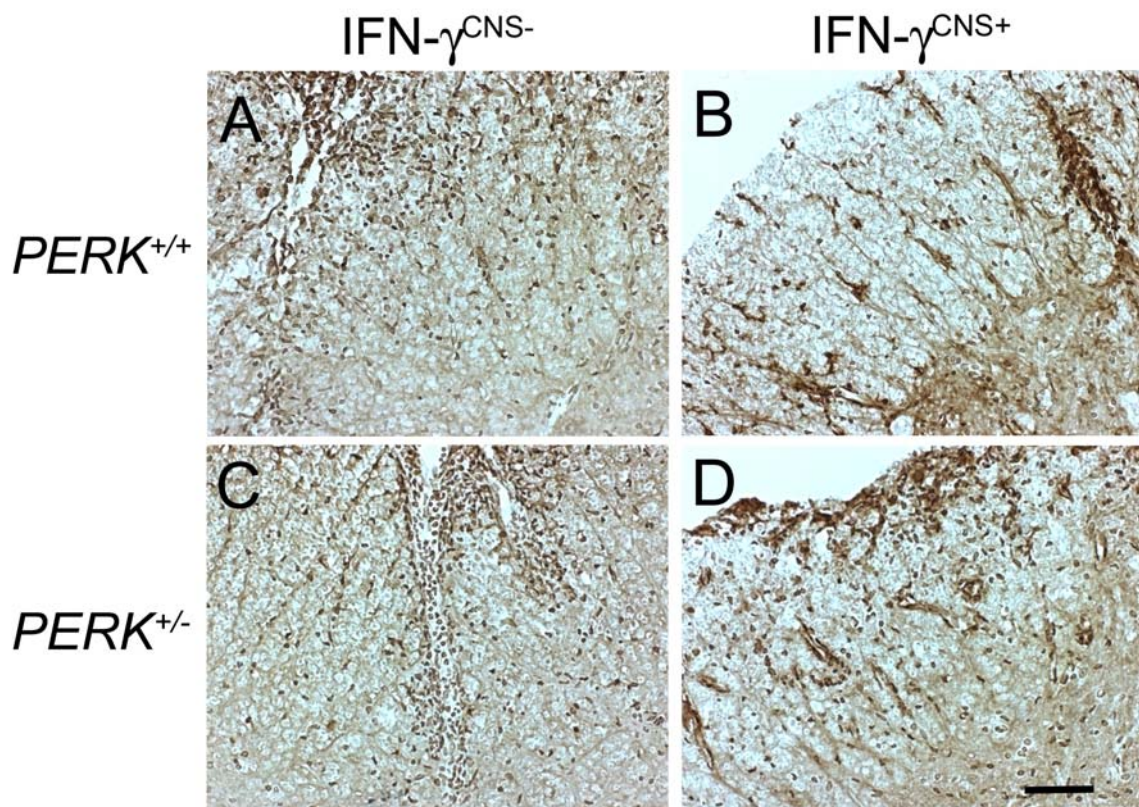

Supplemental Figure 4

## Legend to Supplemental Figures.

**Supplemental Figure 1. CC1 immunostaining revealed normal CC1 positive oligodendrocytes in the lumbar spinal cord of 9-weeks-old naïve mice.** A. non-immunized *GFAP/tTA; TRE/IFN- $\gamma$ ; PERK<sup>+/+</sup>* mice. B. non-immunized *GFAP/tTA; TRE/IFN- $\gamma$ ; PERK<sup>+/-</sup>* mice. N = 3, Scale bar = 25  $\mu$ m.

**Supplemental Figure 2. Both CNS delivery of IFN- $\gamma$  and PERK mutation did not significantly affect peripheral T cell responses.** Mice were immunized with MOG35-55 peptide, and 10 days later the splenocytes were isolated and recall responses to MOG35-55 and OVA323-339 were analyzed. **A and B**, Thymidine incorporation of  $5 \times 10^5$  splenocytes in response to increasing concentrations of MOG35-55 minus the expansion with comparable concentrations of OVA323-339 ( $\Delta$ ) after 4 days in culture. **C**, IFN- $\gamma$  production by  $5 \times 10^5$  splenocytes after 72 hours culture with 10  $\mu$ M MOG35-55. **D and E**, The number of spots in an ELISPOT assay for IL-2 and IL-4 production by  $2.5 \times 10^5$  spleen cells after 24 and 48 hours stimulation, respectively, with 10  $\mu$ M MOG35-55. All panels: error bars represent SEM of three individual animals tested in two separate experiments.

**Supplemental Figure 3. CNS delivery of IFN- $\gamma$  did not activate PERK in T cells, microglia/macrophages and astrocytes.** **A and B**, CD3 and p-PERK double immunostaining showed that the immunoreactivity of p-PERK was undetectable in CD3 positive T cells in lumbar spinal cord of IFN- $\gamma$ <sup>CNS+</sup> mice or IFN- $\gamma$ <sup>CNS-</sup> mice at PID 14. **C**

and **D**, CD11b and p-PERK double immunostaining showed that the immunoreactivity of p-PERK was undetectable in CD11b positive microglia/macrophages in lumbar spinal cord of IFN- $\gamma^{\text{CNS}^+}$  mice or IFN- $\gamma^{\text{CNS}^-}$  mice at PID 14. **E** and **F**, GFAP and p-PERK double immunostaining showed that the immunoreactivity of p-PERK was undetectable in GFAP positive astrocytes in lumbar spinal cord of IFN- $\gamma^{\text{CNS}^+}$  mice or IFN- $\gamma^{\text{CNS}^-}$  mice at PID 14. N = 3, Scale bar = 10  $\mu\text{m}$ .

**Supplemental Figure 4.** MHC-classII immunostaining revealed that CNS delivery of IFN- $\gamma$  did not significantly change the numbers of MHC-classII positive cells in the lumbar spinal cord of mice on a *PERK* wild type or *PERK*<sup>+/-</sup> background at PID 17. N = 3, scale bar = 50  $\mu\text{m}$ .
